# Supplementary material for: Invasive and Native Plants Differentially Respond to Exogenous Phosphorus Addition in Root Growth and Nutrition Regulated by Arbuscular Mycorrhizal Fungi
Source: MDPI journal article supplement (doi:10.3390/plants12112195), 2023-06-01
Supplement: s1 [file s1]

**Table S1:** The three-way ANOVA for the effects of AMF (M<sup>+</sup> vs. M), competition (Intra- vs. Inter-), and P addition (P<sub>0</sub> vs. P<sub>15</sub> vs. P<sub>25</sub>) treatments on the root biomass and root traits of alien plant *E. adenophorum* and indigenous plant *E. lindleyanum*. Abbreviations: M = AMF treatment; C = Competition treatment; P = P addition treatment. The \*, \*\* and \*\*\* indicate  $P < 0.05$ ,  $P < 0.01$  and  $P < 0.001$ , respectively (the \* indicates a significant effect, the \*\* and \*\*\* indicate an extremely significant effect).

| Root traits           | Treatments | df | <i>E. adenophorum</i> |          | <i>E.lindleyanum</i> |          |
|-----------------------|------------|----|-----------------------|----------|----------------------|----------|
|                       |            |    | F                     | P        | F                    | P        |
| Root biomass          | M          | 1  | 125.416               | 0.000*** | 531.300              | 0.000*** |
|                       | C          | 1  | 78.585                | 0.000*** | 139.815              | 0.000*** |
|                       | P          | 2  | 28.160                | 0.000*** | 20.312               | 0.000*** |
|                       | M×C        | 1  | 60.921                | 0.000*** | 12.049               | 0.001**  |
|                       | M×P        | 2  | 0.938                 | 0.397    | 12.239               | 0.000*** |
|                       | C×P        | 2  | 4.873                 | 0.011*   | 51.702               | 0.000*** |
|                       | M×C×P      | 2  | 5.000                 | 0.012*   | 33.915               | 0.000*** |
| Root length           | M          | 1  | 125.416               | 0.000*** | 531.300              | 0.000*** |
|                       | C          | 1  | 626.776               | 0.000*** | 104.501              | 0.000*** |
|                       | P          | 2  | 125.680               | 0.000*** | 69.217               | 0.000*** |
|                       | M×C        | 2  | 12.612                | 0.000*** | 50.481               | 0.000*** |
|                       | M×P        | 2  | 6.580                 | 0.003**  | 27.195               | 0.000*** |
|                       | C×P        | 2  | 12.612                | 0.000*** | 50.481               | 0.000*** |
|                       | M×C×P      | 2  | 16.558                | 0.000*** | 12.586               | 0.000*** |
| Root surface area     | M          | 1  | 235.191               | 0.000*** | 875.022              | 0.000*** |
|                       | C          | 1  | 180.723               | 0.000*** | 346.012              | 0.000*** |
|                       | P          | 2  | 37.517                | 0.000*** | 115.006              | 0.000*** |
|                       | M×C        | 1  | 90.153                | 0.000*** | 167.600              | 0.000*** |
|                       | M×P        | 2  | 0.176                 | 0.839    | 69.818               | 0.000*** |
|                       | C×P        | 2  | 12.658                | 0.000*** | 125.966              | 0.000*** |
|                       | M×C×P      | 2  | 11.373                | 0.000*** | 55.906               | 0.000*** |
| Root volume           | M          | 1  | 769.227               | 0.000*** | 1189.482             | 0.000*** |
|                       | C          | 1  | 741.429               | 0.000*** | 324.822              | 0.000*** |
|                       | P          | 2  | 125.579               | 0.000*** | 43.850               | 0.000*** |
|                       | M×C        | 1  | 489.911               | 0.000*** | 199.674              | 0.000*** |
|                       | M×P        | 2  | 2.736                 | 0.073    | 38.785               | 0.000*** |
|                       | C×P        | 2  | 41.194                | 0.000*** | 161.935              | 0.000*** |
|                       | M×C×P      | 2  | 28.444                | 0.000*** | 145.227              | 0.000*** |
| Root average diameter | M          | 1  | 2.064                 | 0.156    | 36.503               | 0.000*** |
|                       | C          | 1  | 33.931                | 0.000*** | 1.584                | 0.213    |
|                       | P          | 2  | 5.296                 | 0.008**  | 8.697                | 0.000*** |
|                       | M×C        | 1  | 7.327                 | 0.009**  | 7.364                | 0.009**  |
|                       | M×P        | 2  | 0.290                 | 0.749    | 5.529                | 0.006**  |
|                       | C×P        | 2  | 19.700                | 0.000*** | 4.640                | 0.013*   |
|                       | M×C×P      | 2  | 2.496                 | 0.091    | 1.314                | 0.276    |
| Root tips             | M          | 1  | 785.955               | 0.000*** | 213.574              | 0.000*** |

|                             |       |   |         |          |         |          |
|-----------------------------|-------|---|---------|----------|---------|----------|
|                             | C     | 1 | 312.050 | 0.000*** | 212.563 | 0.000*** |
|                             | P     | 2 | 129.418 | 0.000*** | 6.348   | 0.003**  |
|                             | M×C   | 1 | 130.756 | 0.000*** | 36.801  | 0.000*** |
|                             | M×P   | 2 | 16.163  | 0.000*** | 2.275   | 0.112    |
|                             | C×P   | 2 | 10.462  | 0.000*** | 14.975  | 0.000*** |
|                             | M×C×P | 2 | 3.259   | 0.045*   | 2.250   | 0.114    |
| Root<br>branching<br>points | M     | 1 | 583.298 | 0.000*** | 395.456 | 0.000*** |
|                             | C     | 1 | 315.762 | 0.000*** | 121.715 | 0.000*** |
|                             | P     | 2 | 0.938   | 0.397    | 11.365  | 0.000*** |
|                             | M×C   | 1 | 129.066 | 0.000*** | 3.526   | 0.065    |
|                             | M×P   | 2 | 10.460  | 0.000*** | 2.366   | 0.103    |
|                             | C×P   | 2 | 14.289  | 0.000*** | 10.685  | 0.000*** |
|                             | M×C×P | 2 | 9.832   | 0.000*** | 7.419   | 0.001**  |
